# Supplementary figures and images for: Early Modulation of Circulating MicroRNAs Levels in HER2-Positive Breast Cancer Patients Treated with Trastuzumab-Based Neoadjuvant Therapy
Source: MDPI journal article supplement (doi:10.3390/ijms21041386), 2020-02-18

**Figure S1** Workflow of the study population

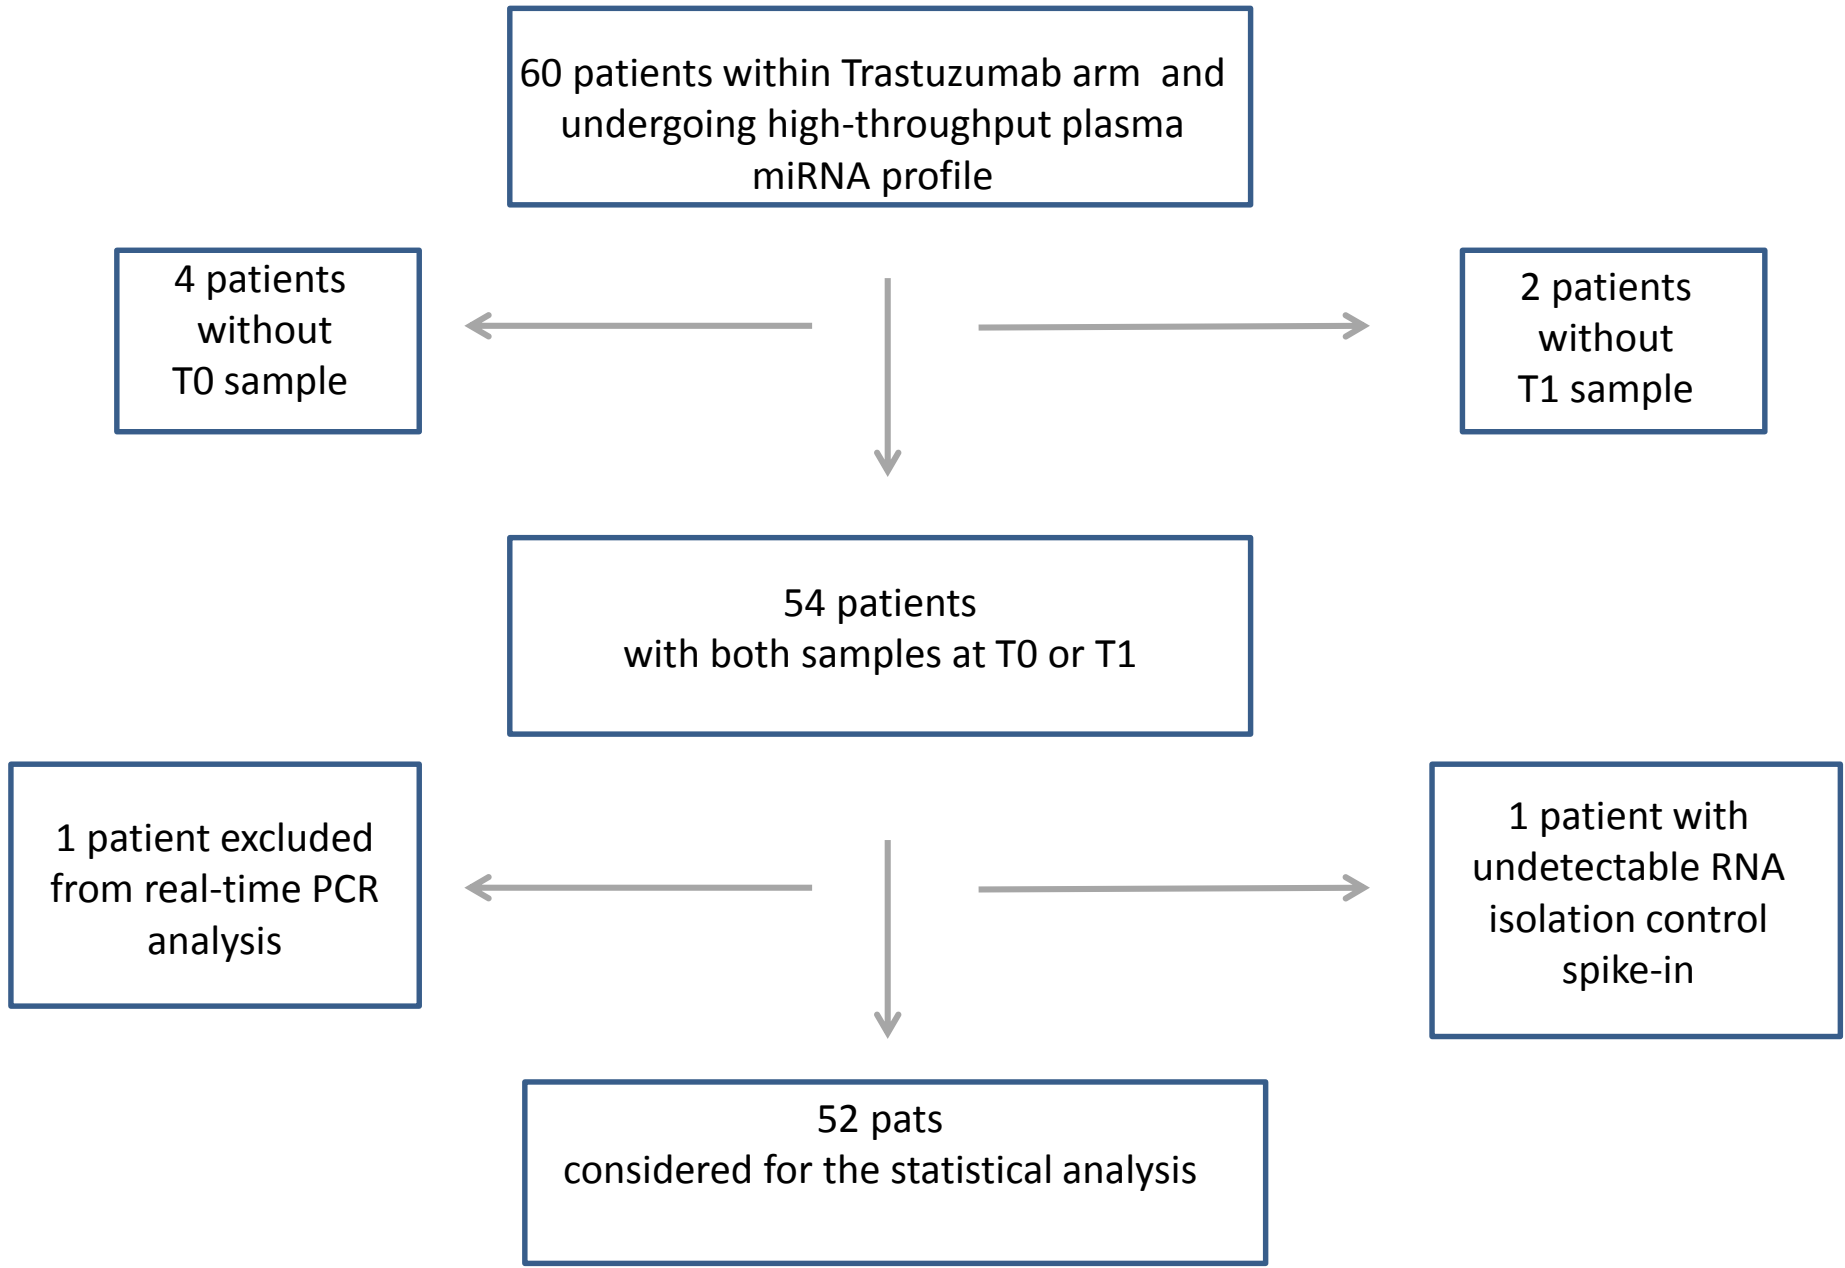

Supplement: s1 [file s1]

**TCGA miRNA 148a-3p**

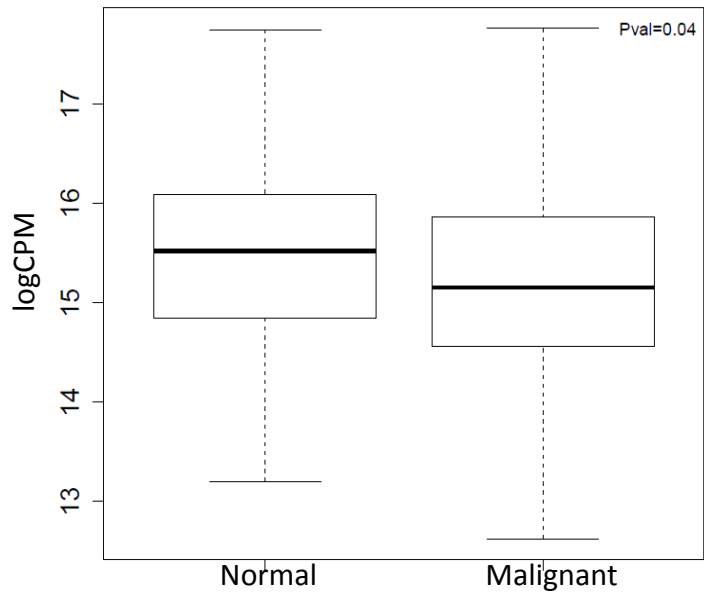

**GSE51908 miRNA 148a-3p**

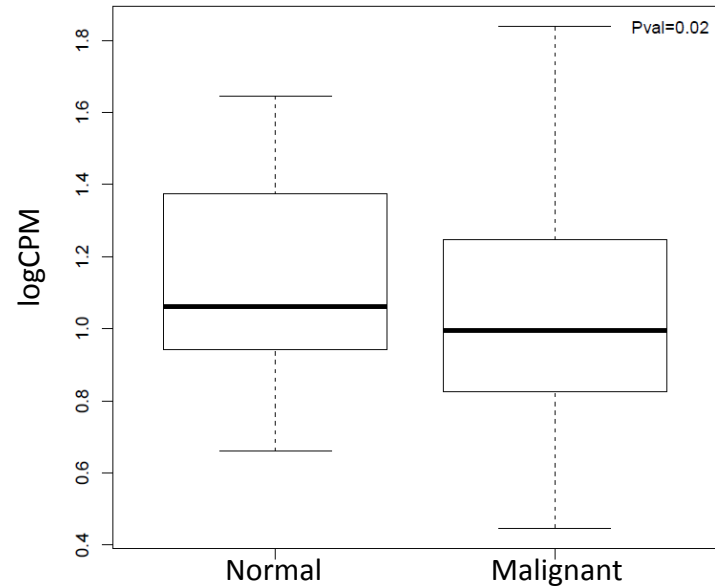

**TCGA miRNA 374a-5p**

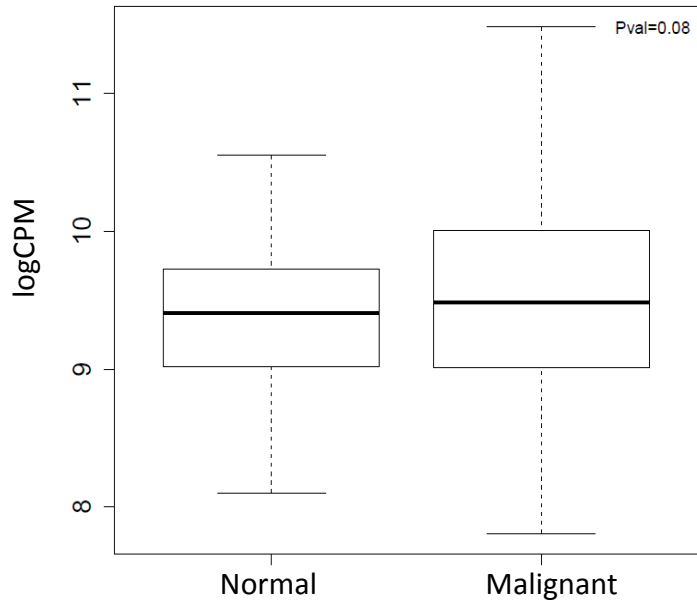

**GSE51908 miRNA 374a-5p**

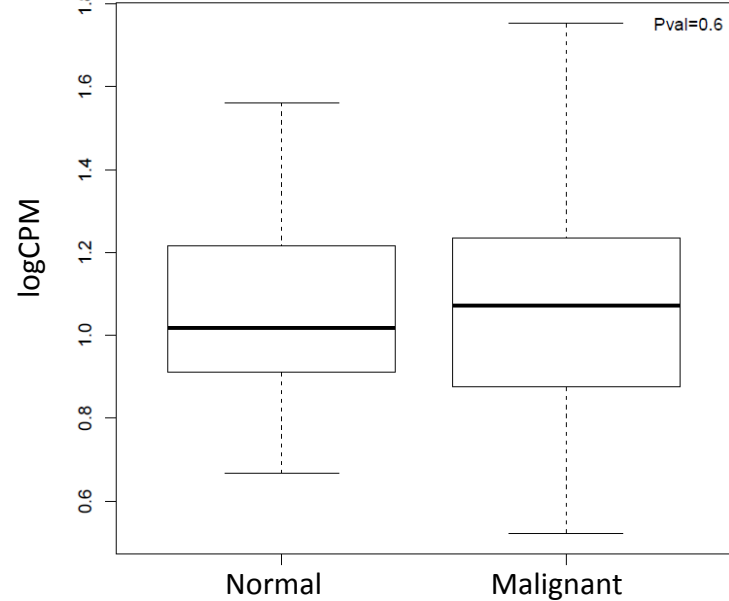

Supplement: s1 [file s1]

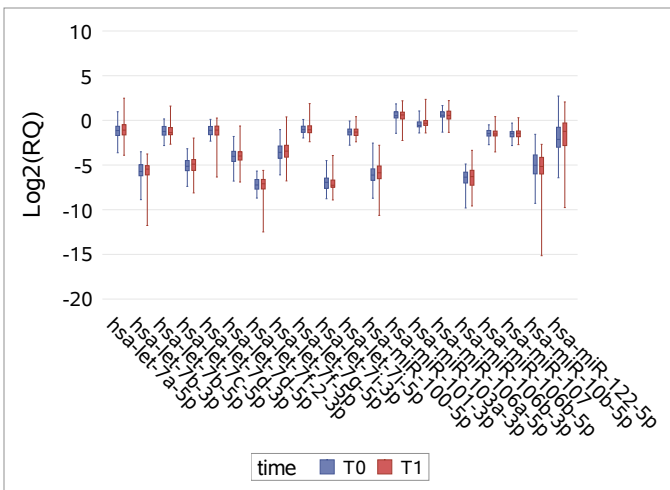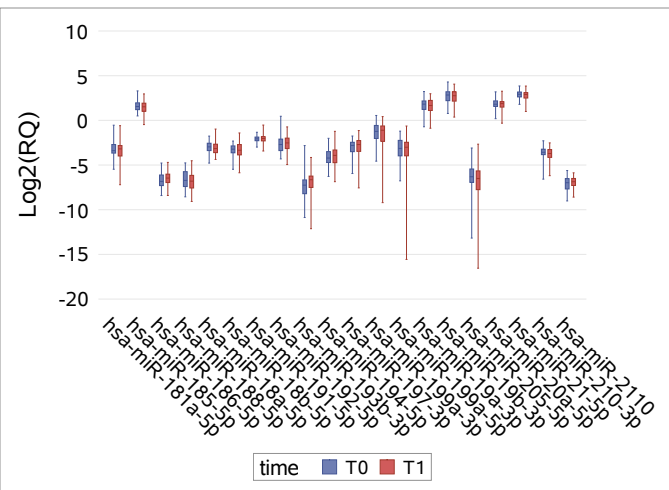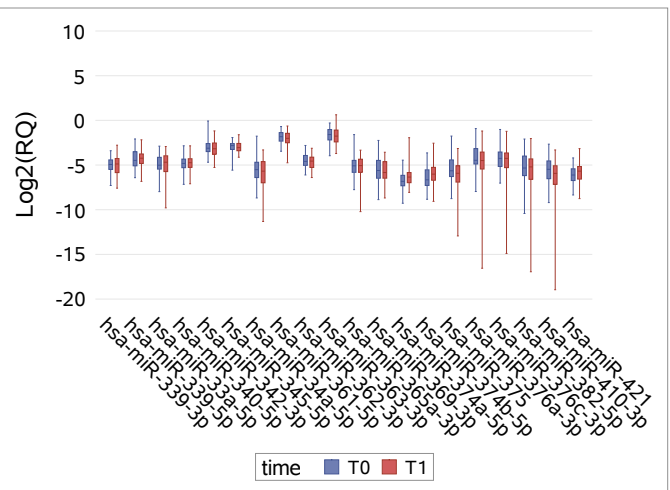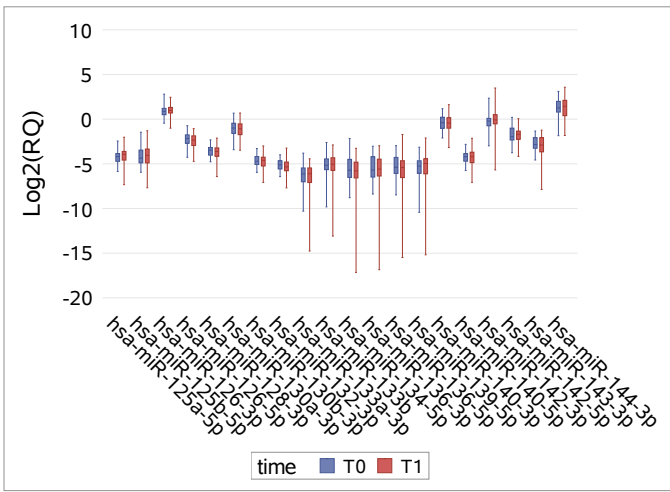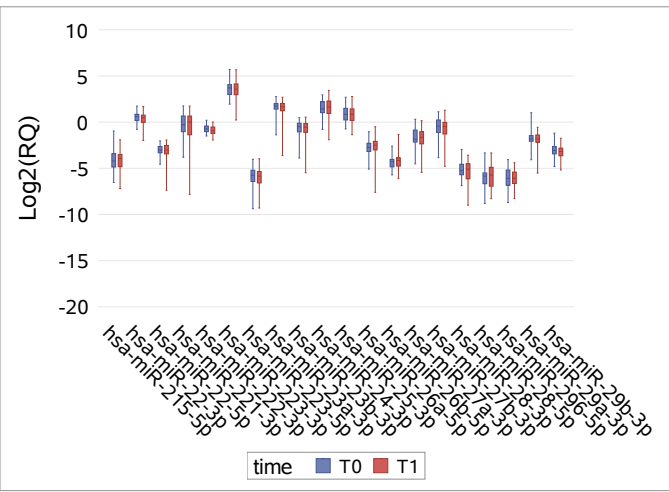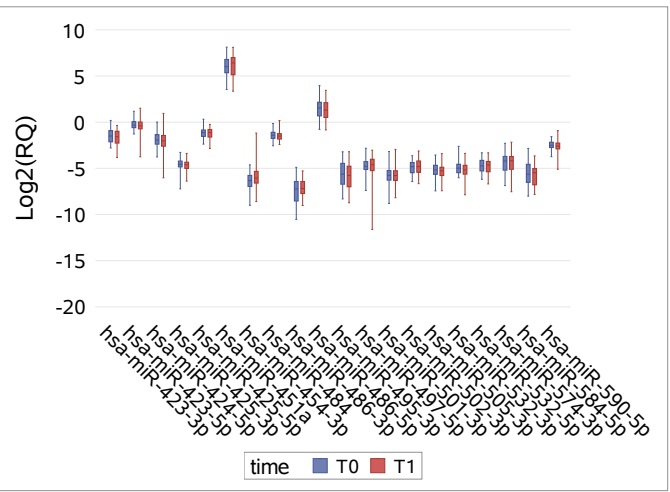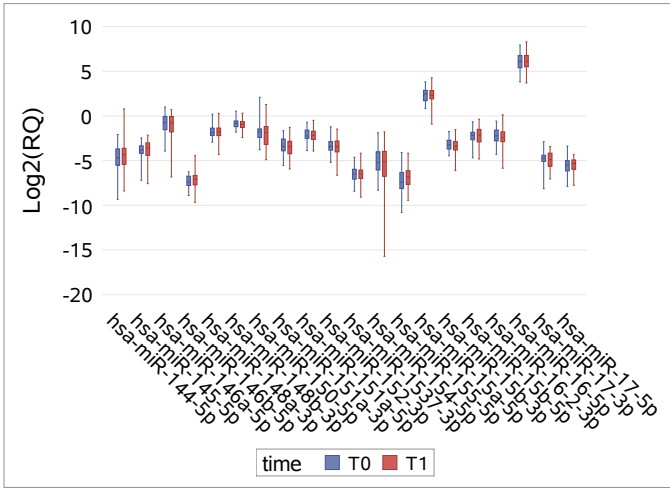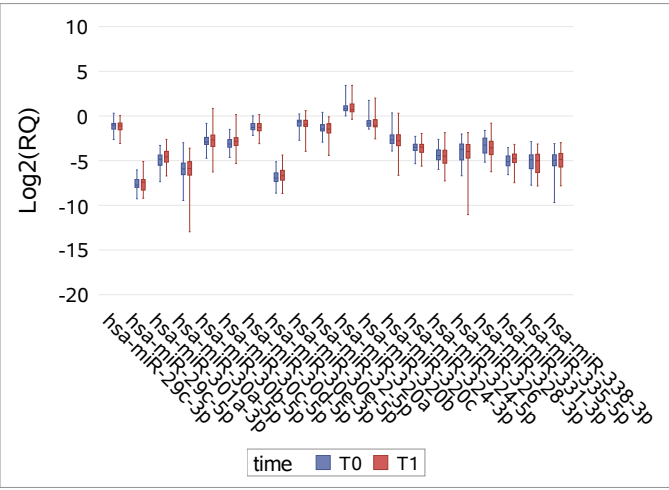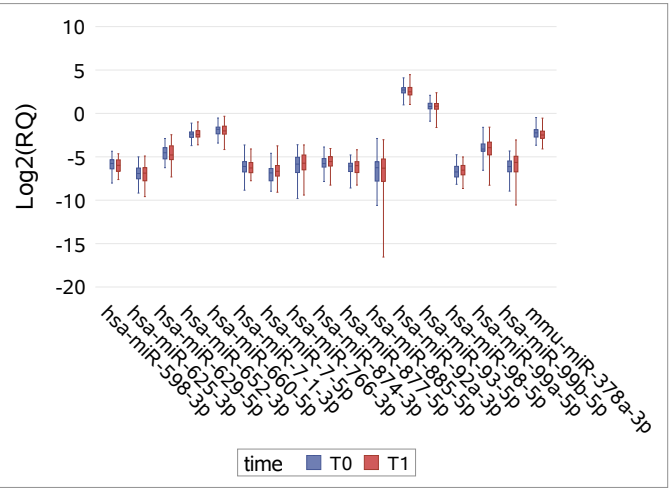

Supplement: s1 [file s1]
